# Supplementary material for: In vitro antiplasmodial activity and toxicological profile of extracts, fractions and chemical constituents of leaves and stem bark from Dacryodes edulis (Burseraceae)
Source: Springer Nature journal article supplement (doi:10.1186/s12906-023-03957-2), 2023-06-27
Supplement: MOESM1 [file 25542726]

## ADDITIONAL FILE

***In vitro* antiplasmodial activity and toxicological profile of extracts, fractions and chemical constituents of leaves and stem bark of *Dacryodes edulis* (Burseraceae)**

**By**

**Kevine Johane Jumeta Dongmo <sup>1</sup>, Mariscal Brice Tchatat Tali <sup>2</sup>, Yannick Stéphane Fotsing Fongang <sup>3,\*</sup>, Pierre Leonel K. Tafokeu Taguimjeu <sup>1</sup>, Donald Ulrich Kenou Kagho <sup>1</sup>, Gabin Thierry Bitchagno <sup>4</sup>, Bruno Ndjakou Lenta <sup>5,\*</sup>, Fabrice Boyom Fekam <sup>2</sup>, Norbert Sewald <sup>6</sup>, Silvère Augustin Ngouela <sup>1</sup>**

<sup>1</sup> Department of Organic Chemistry, Faculty of Science, University of Yaoundé I, P.O. Box 812 Yaoundé, Yaoundé, Cameroon ([jumetakevine@yahoo.fr](mailto:jumetakevine@yahoo.fr); [taguimjeuleonel@outlook.fr](mailto:taguimjeuleonel@outlook.fr); [dkaghokenou@yahoo.fr](mailto:dkaghokenou@yahoo.fr))

<sup>2</sup> Antimicrobial and Biocontrol Agents Unit, Faculty of Science, University of Yaoundé I, P.O. Box 812 Yaoundé, Yaoundé, Cameroon ([b.tchatat@yahoo.com](mailto:b.tchatat@yahoo.com); [tchatatb7@gmail.com](mailto:tchatatb7@gmail.com))

<sup>3</sup> Department of Chemistry, Higher Teachers' Training College, The University of Maroua, P.O. Box 55 Maroua, Maroua, Cameroon ([fongangfys@yahoo.fr](mailto:fongangfys@yahoo.fr))

<sup>4</sup> Department of Chemistry, University of Dschang, P.O. Box 67 Dschang, Cameroon ([bmgt198716@ymail.com](mailto:bmgt198716@ymail.com))

<sup>5</sup> Department of Chemistry, Higher Teacher Training College, University of Yaoundé I, P.O. Box 47 Yaoundé, Yaoundé, Cameroon ([lentabruno@yahoo.fr](mailto:lentabruno@yahoo.fr))

<sup>6</sup> Department of Chemistry, Bielefeld University, P.O. Box 100131, 33501, Bielefeld, Germany ([Norbert.sewald@uni-bielefeld.de](mailto:Norbert.sewald@uni-bielefeld.de))

**\* Corresponding Authors** : Yannick Stéphane Fotsing Fongang ([fongangfys@yahoo.fr](mailto:fongangfys@yahoo.fr); Orcid number: 0000-0002-9311-9945) and Bruno Ndjakou Lenta ([lentabruno@yahoo.fr](mailto:lentabruno@yahoo.fr))

## Table of Contents

|                                                                                                             |    |
|-------------------------------------------------------------------------------------------------------------|----|
| <b>Figure S1:</b> HR-ESI mass spectrum of <b>1</b> .....                                                    | 3  |
| <b>Figure S2:</b> <sup>1</sup> H NMR spectrum (Pyridin- <i>d</i> <sub>5</sub> , 600 MHz) of <b>1</b> .....  | 3  |
| <b>Figure S3:</b> <sup>13</sup> C NMR spectrum (Pyridin- <i>d</i> <sub>5</sub> , 150 MHz) of <b>1</b> ..... | 4  |
| <b>Figure S4:</b> ESI mass spectrum of <b>2</b> .....                                                       | 4  |
| <b>Figure S5:</b> <sup>1</sup> H NMR spectrum (CDCl <sub>3</sub> , 600 MHz) of <b>2</b> .....               | 5  |
| <b>Figure S6:</b> <sup>13</sup> C NMR spectrum (CDCl <sub>3</sub> , 150 MHz) of <b>2</b> .....              | 5  |
| <b>Figure S7:</b> <sup>1</sup> H NMR spectrum (Pyridin- <i>d</i> <sub>5</sub> , 600 MHz) of <b>3</b> .....  | 6  |
| <b>Figure S8:</b> <sup>1</sup> H NMR spectrum (Pyridin- <i>d</i> <sub>5</sub> , 600 MHz) of <b>4</b> .....  | 6  |
| <b>Figure S9:</b> <sup>13</sup> C NMR spectrum (Pyridin- <i>d</i> <sub>5</sub> , 150 MHz) of <b>4</b> ..... | 7  |
| <b>Figure S10:</b> HR-ESI mass spectrum of <b>5</b> .....                                                   | 7  |
| <b>Figure S11:</b> <sup>1</sup> H NMR spectrum (CD <sub>3</sub> OD, 600 MHz) of <b>5</b> .....              | 8  |
| <b>Figure S12:</b> <sup>13</sup> C NMR spectrum (CD <sub>3</sub> OD, 150 MHz) of <b>5</b> .....             | 8  |
| <b>Figure S13:</b> <sup>1</sup> H NMR spectrum (CD <sub>3</sub> OD, 600 MHz) of <b>6</b> .....              | 9  |
| <b>Figure S14:</b> <sup>13</sup> C NMR spectrum (CD <sub>3</sub> OD, 150 MHz) of <b>6</b> .....             | 9  |
| <b>Figure S15:</b> HR-ESI mass spectrum of <b>7</b> .....                                                   | 10 |
| <b>Figure S16:</b> <sup>1</sup> H NMR spectrum (CDCl <sub>3</sub> , 600 MHz) of <b>7</b> .....              | 10 |
| <b>Figure S17:</b> <sup>13</sup> C NMR spectrum (CDCl <sub>3</sub> , 150 MHz) of <b>7</b> .....             | 11 |
| <b>Figure S18:</b> <sup>1</sup> H NMR spectrum (CDCl <sub>3</sub> , 600 MHz) of <b>8</b> .....              | 11 |
| <b>Figure S19:</b> <sup>13</sup> C NMR spectrum (CDCl <sub>3</sub> , 150 MHz) of <b>8</b> .....             | 12 |
| <b>Figure S20:</b> HR-ESI mass spectrum of <b>9</b> .....                                                   | 12 |
| <b>Figure S21:</b> <sup>1</sup> H NMR spectrum (CDCl <sub>3</sub> , 600 MHz) of <b>9</b> .....              | 13 |
| <b>Figure S22:</b> <sup>13</sup> C NMR spectrum (CDCl <sub>3</sub> , 150 MHz) of <b>9</b> .....             | 13 |
| <b>Figure S23:</b> <sup>1</sup> H NMR spectrum (CD <sub>3</sub> OD, 600 MHz) of <b>10</b> .....             | 14 |
| <b>Figure S24:</b> <sup>1</sup> H NMR spectrum (CDCl <sub>3</sub> , 600 MHz) of <b>11</b> .....             | 14 |
| <b>Figure S25:</b> <sup>13</sup> C NMR spectrum (CDCl <sub>3</sub> , 150 MHz) of <b>11</b> .....            | 15 |
| <b>Figure S26:</b> <sup>1</sup> H NMR spectrum (CDCl <sub>3</sub> , 600 MHz) of <b>12</b> .....             | 15 |
| <b>Figure S27:</b> <sup>13</sup> C NMR spectrum (CDCl <sub>3</sub> , 150 MHz) of <b>12</b> .....            | 16 |
| <b>Figure S28:</b> <sup>1</sup> H NMR spectrum (CDCl <sub>3</sub> , 600 MHz) of <b>13</b> .....             | 16 |
| <b>Figure S29:</b> <sup>13</sup> C NMR spectrum (CDCl <sub>3</sub> , 150 MHz) of <b>13</b> .....            | 17 |
| <b>Figure S30:</b> <sup>1</sup> H NMR spectrum (CDCl <sub>3</sub> , 600 MHz) of <b>14</b> .....             | 17 |
| <b>Figure S31:</b> <sup>13</sup> C NMR spectrum (CDCl <sub>3</sub> , 150 MHz) of <b>14</b> .....            | 18 |

# Lichexanthone (1)

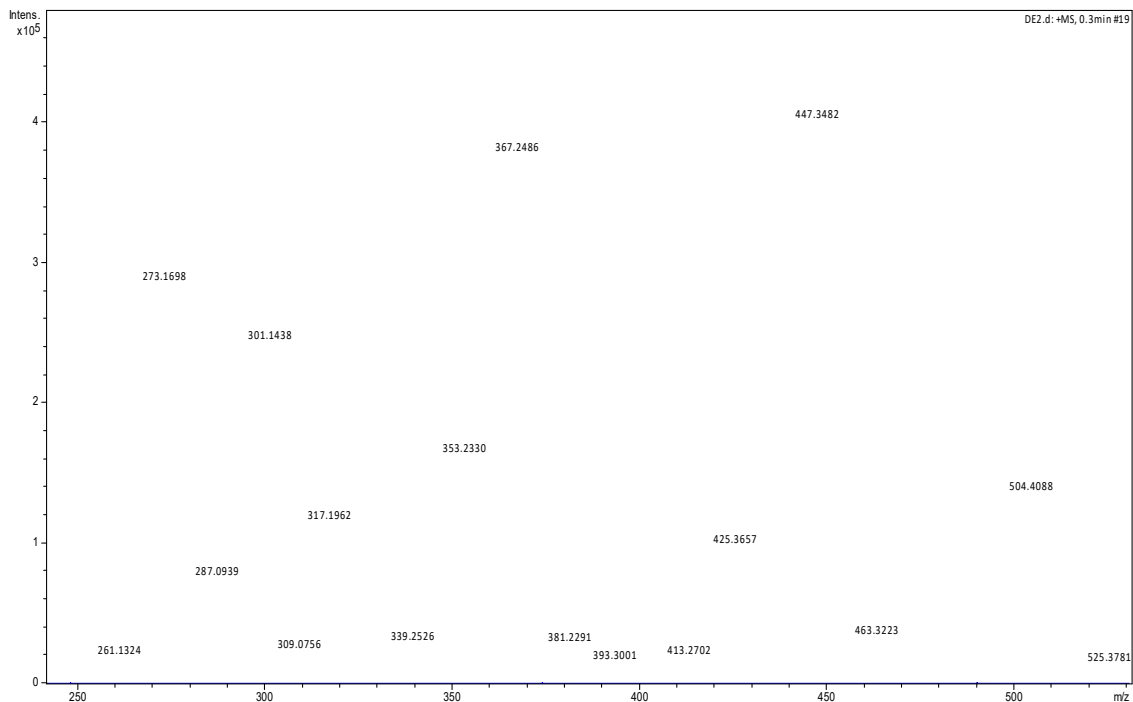

Figure S1: HR-ESI mass spectrum of **1**

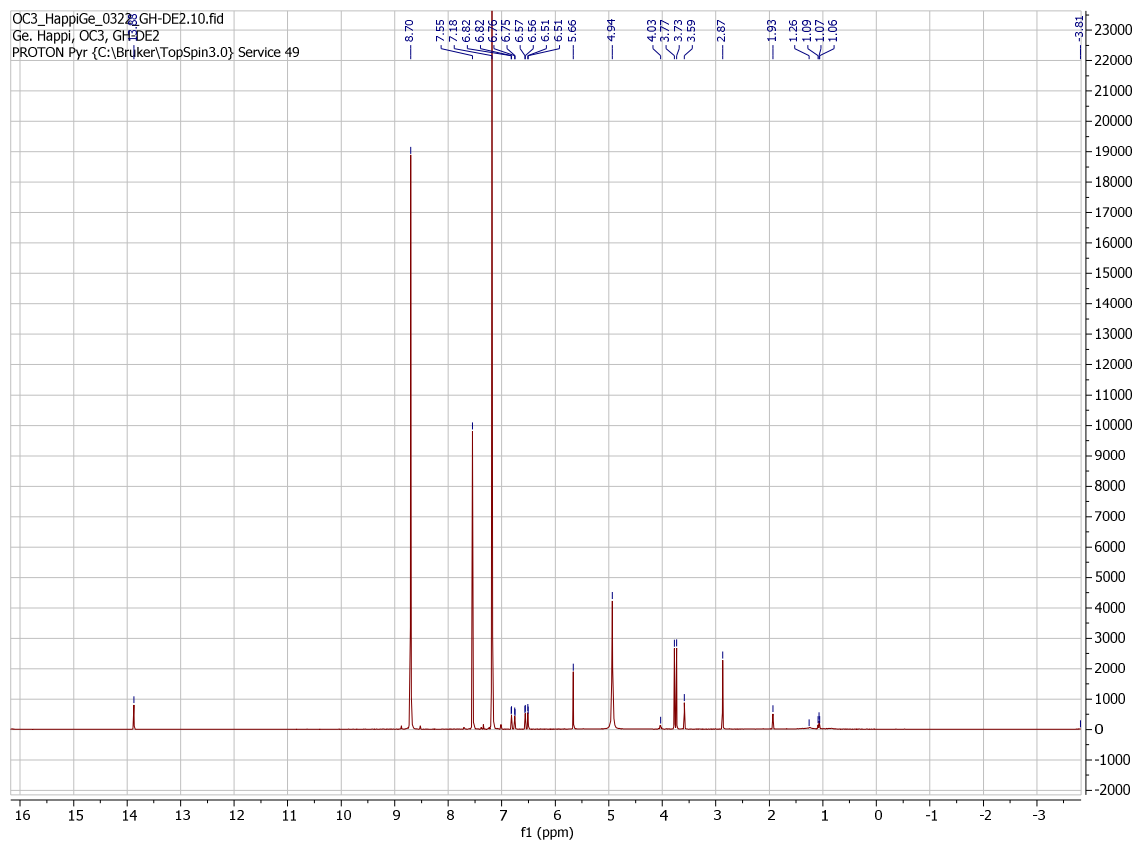

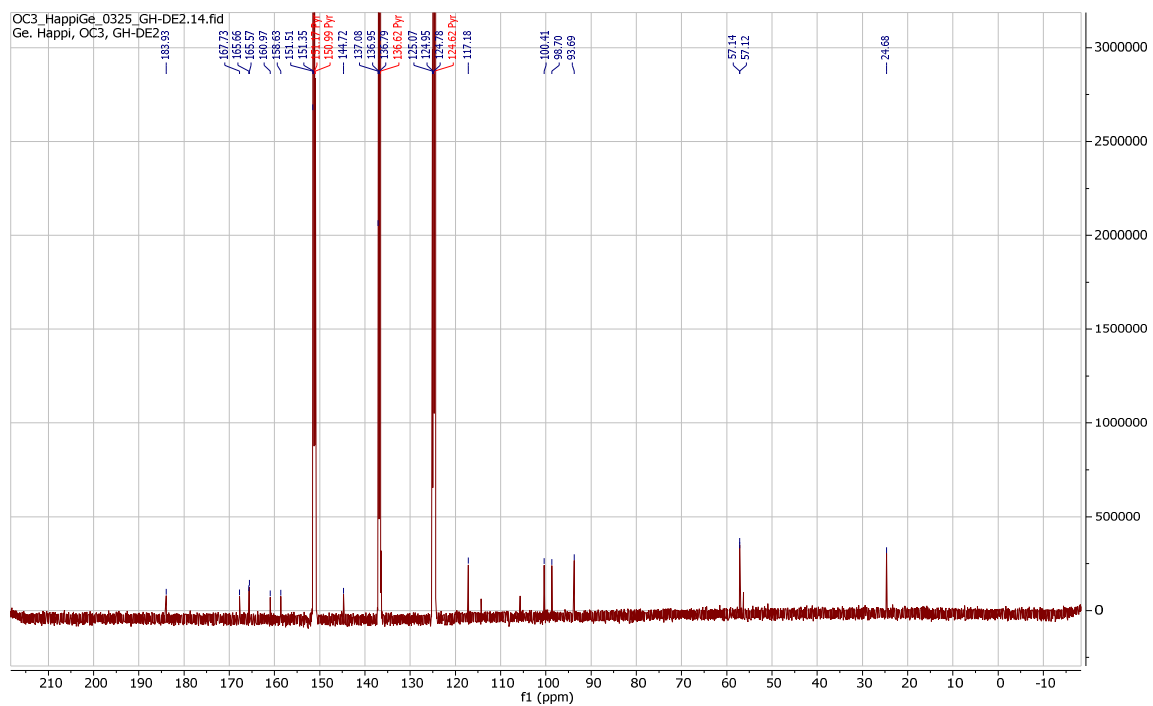

Figure S3:  $^{13}\text{C}$  NMR spectrum (Pyridin- $d_5$ , 150 MHz) of **1**

**Griseoxanthone (2)**

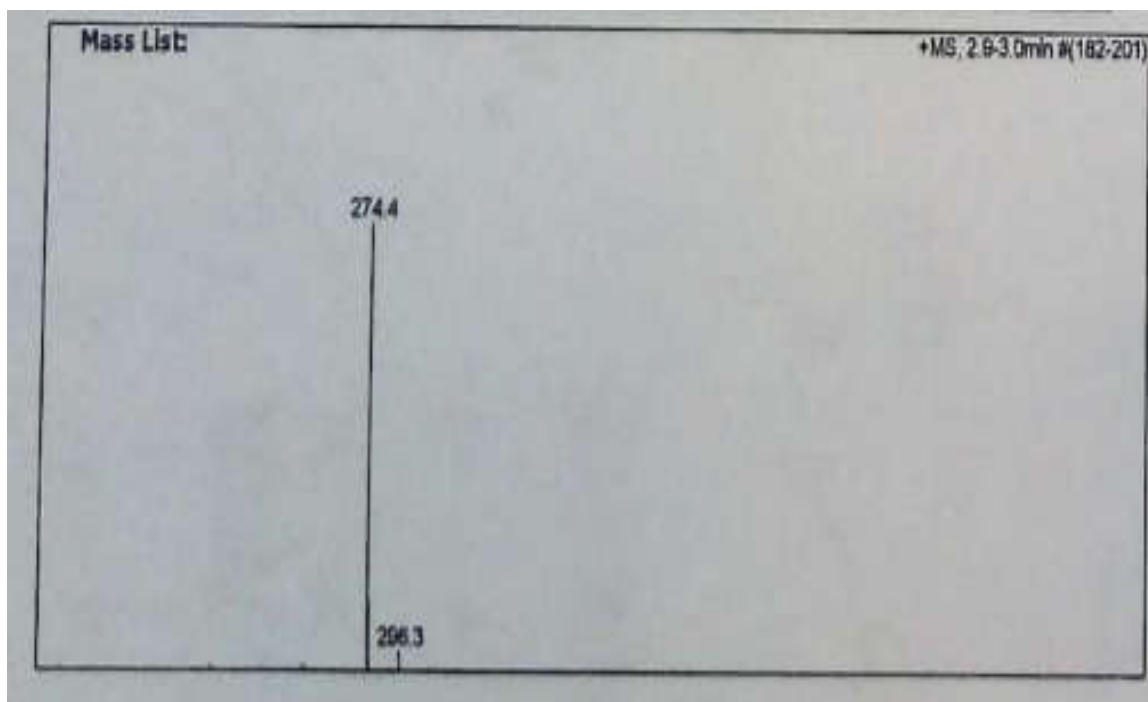

Figure S4: ESI mass spectrum of **2**

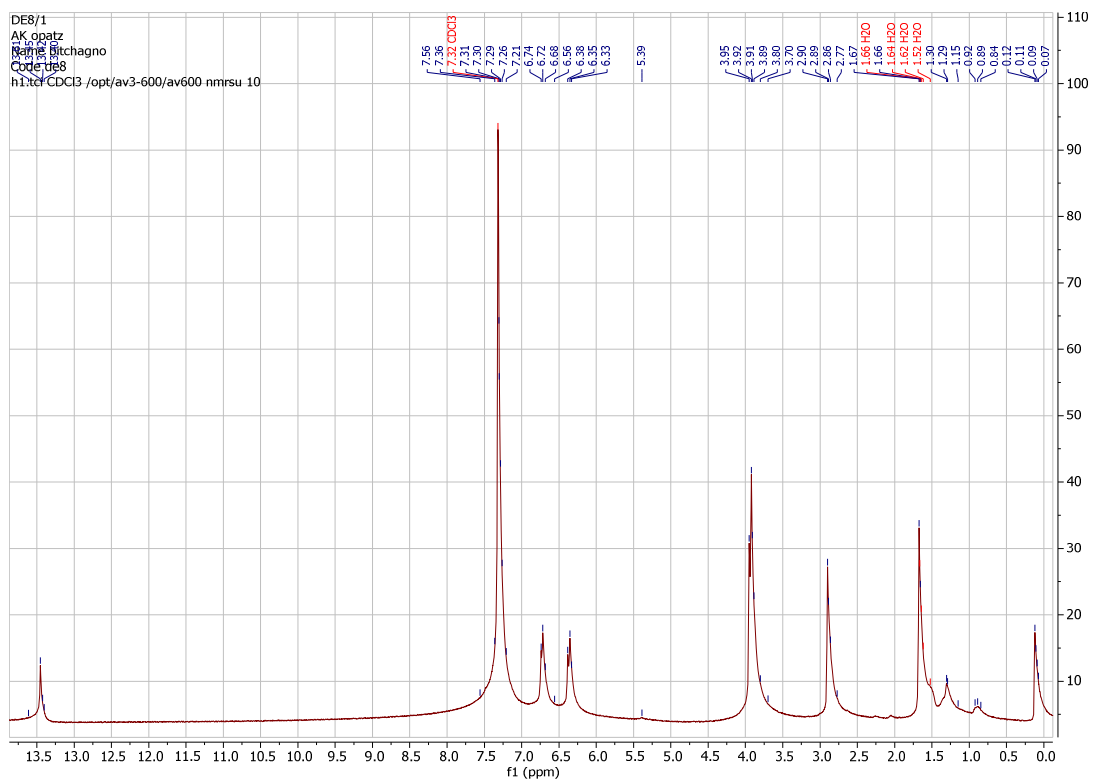

Figure S5:  $^1\text{H}$  NMR spectrum ( $\text{CDCl}_3$ , 600 MHz) of **2**

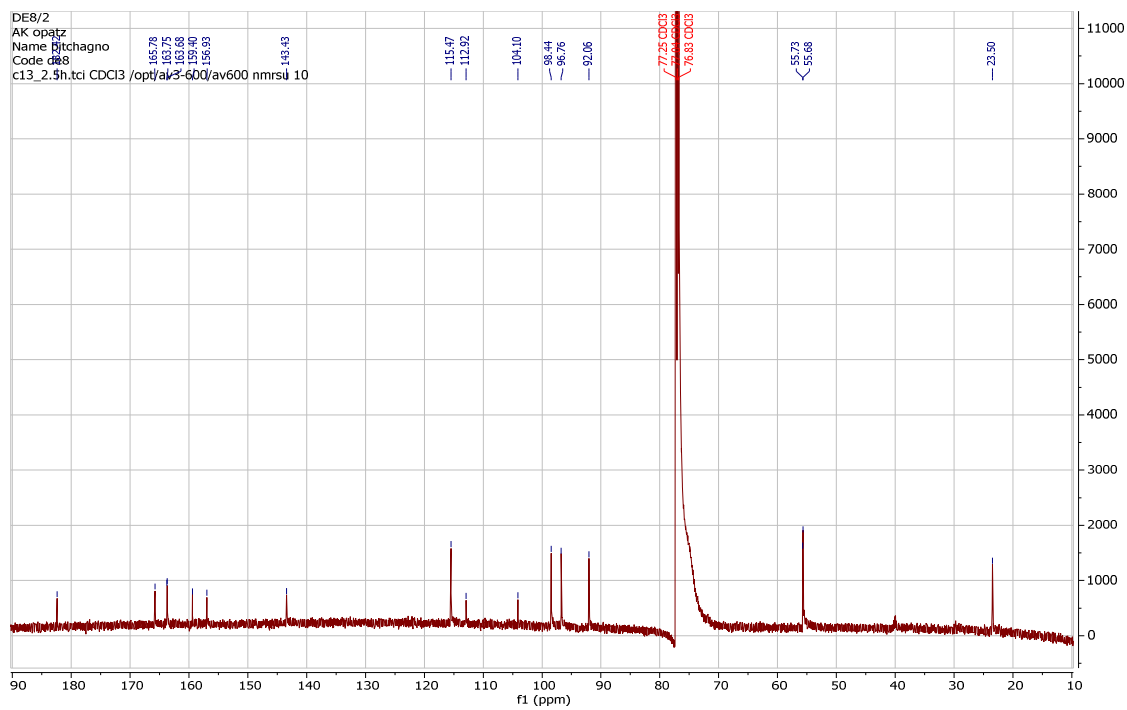

Figure S6:  $^{13}\text{C}$  NMR spectrum ( $\text{CDCl}_3$ , 150 MHz) of **2**

### 3-3'-*O*-dimethylellargic acid (3)

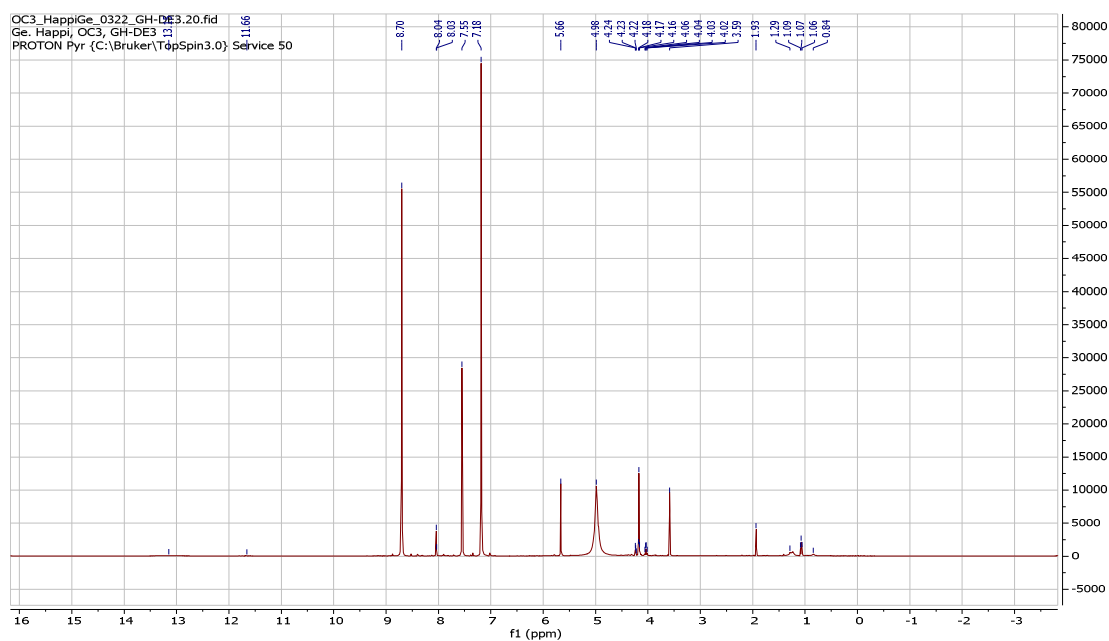

Figure S7:  $^1\text{H}$  NMR spectrum (Pyridin- $d_5$ , 600 MHz) of 3

### 3,3',4-tri-*O*-methylellargic (4)

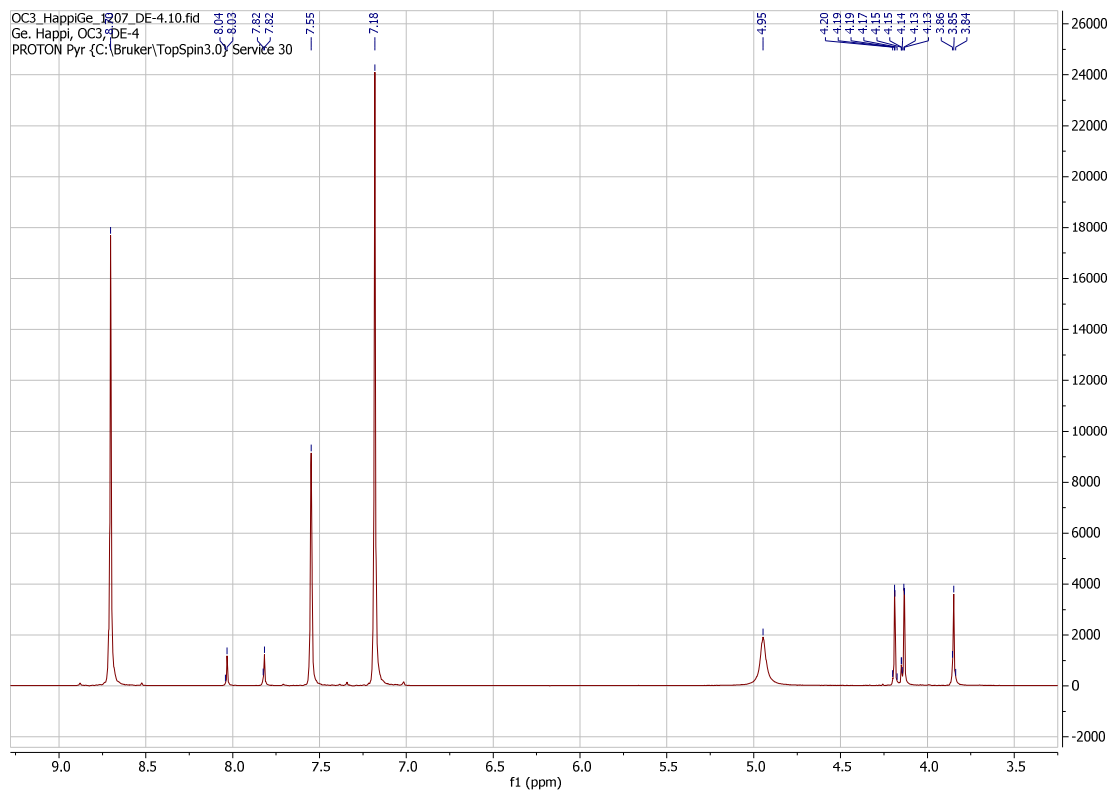

Figure S8:  $^1\text{H}$  NMR spectrum (Pyridin- $d_5$ , 600 MHz) of 4

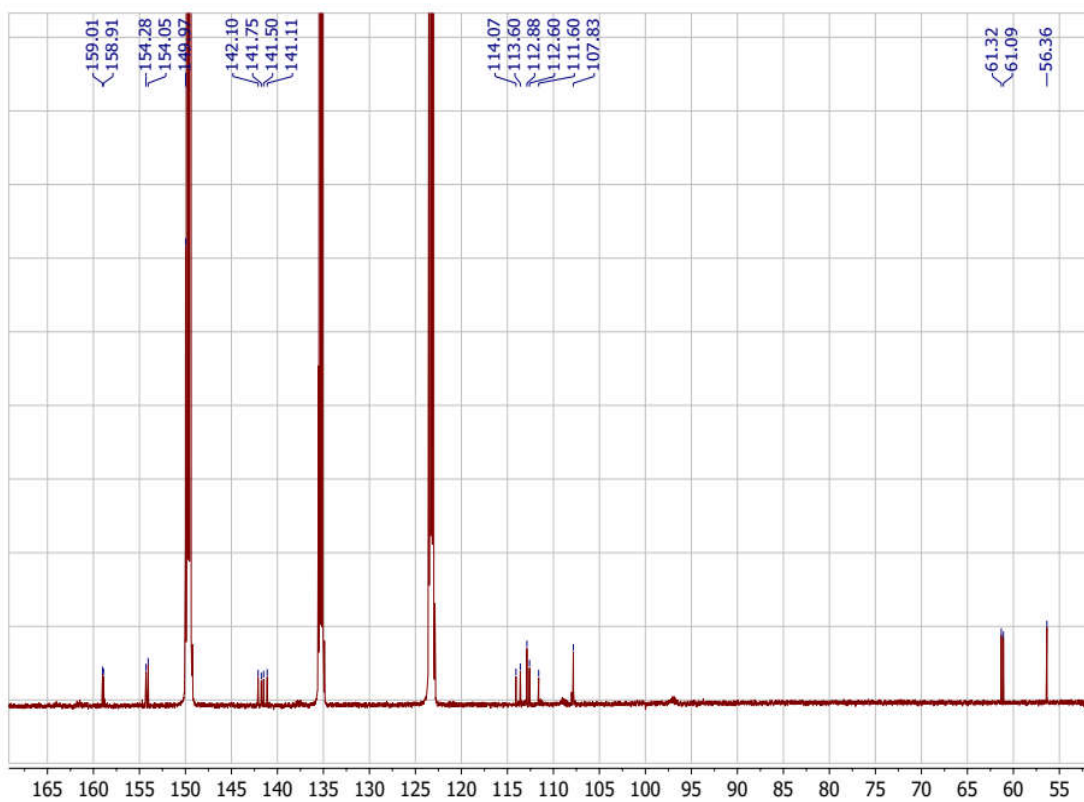

**Figure S9:**  $^{13}\text{C}$  NMR spectrum (Pyridin- $d_5$ , 150 MHz) of **4**

**3,3''-di-*O*-methylellagic acid 4-*O*-(3''-galloyl)- $\beta$ -*D*-xylopyranoside (**5**)**

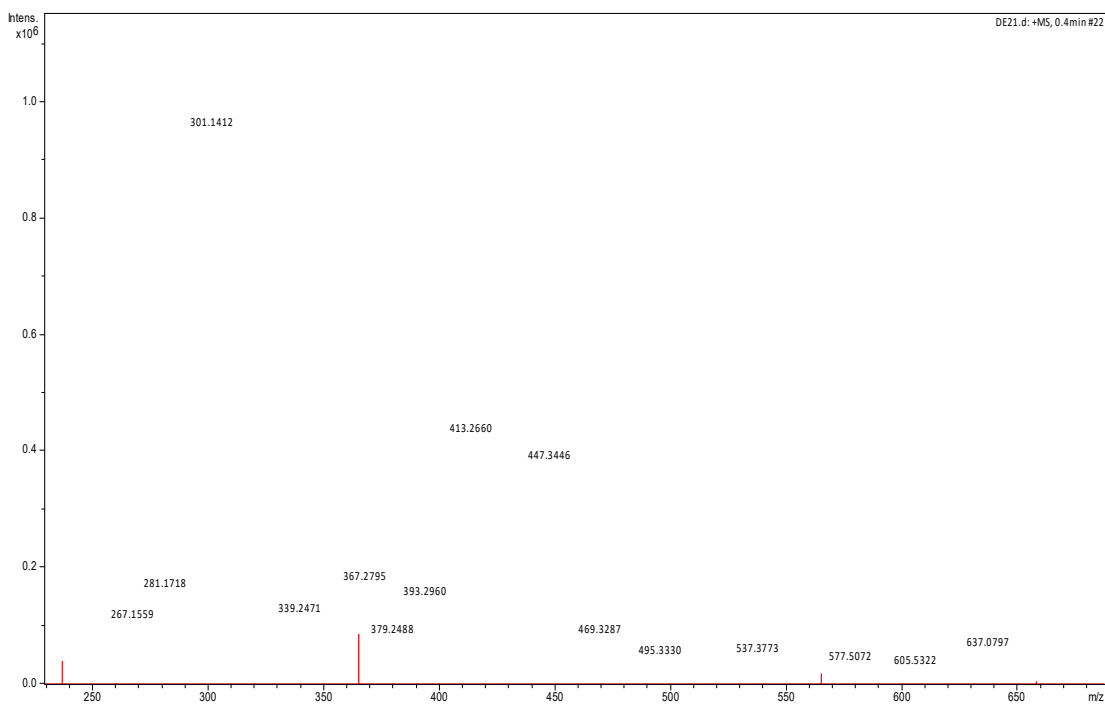

**Figure S10:** HR-ESI mass spectrum of **5**

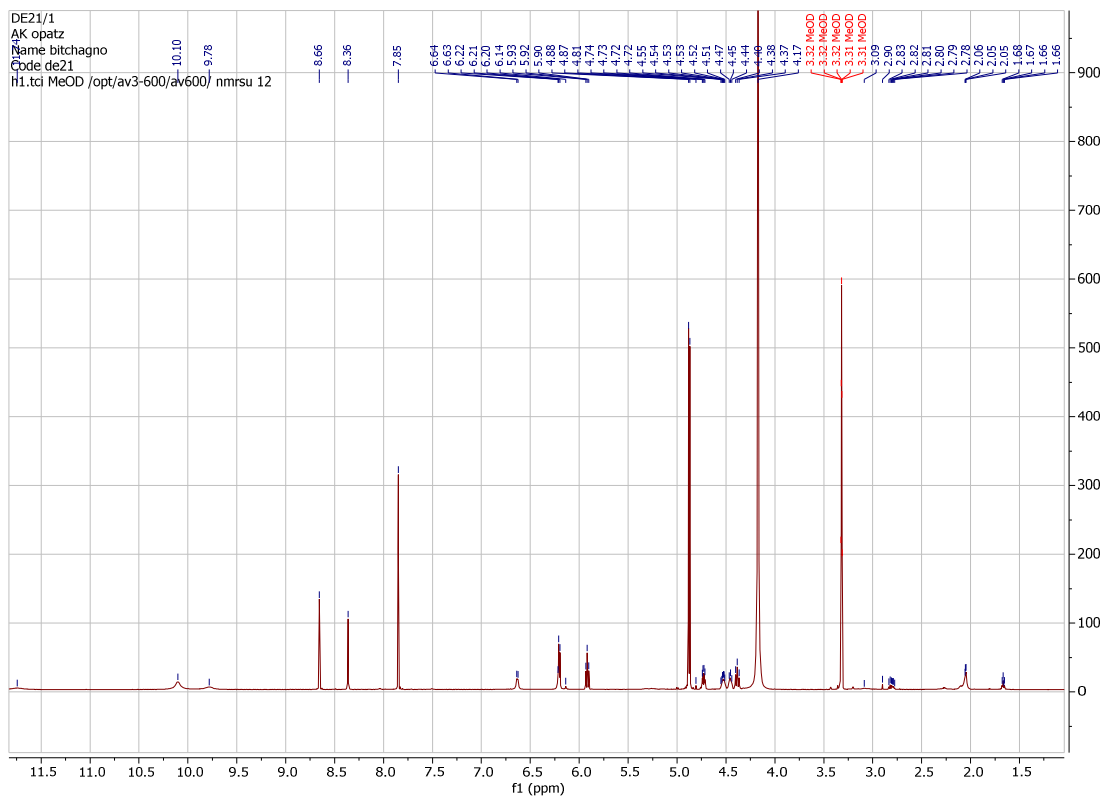

Figure S11:  $^1\text{H}$  NMR spectrum ( $\text{CD}_3\text{OD}$ , 600 MHz) of **5**

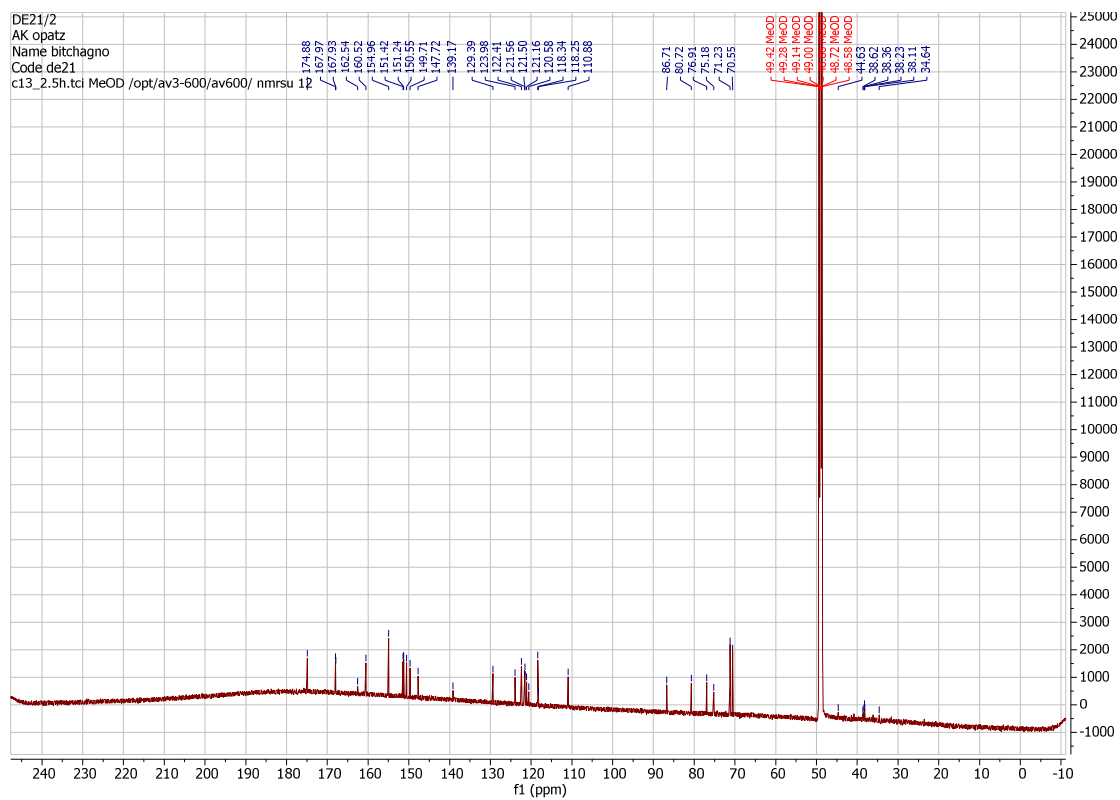

Figure S12:  $^{13}\text{C}$  NMR spectrum ( $\text{CD}_3\text{OD}$ , 150 MHz) of **5**



### 3,4-dihydroxybenzoic acid (6)

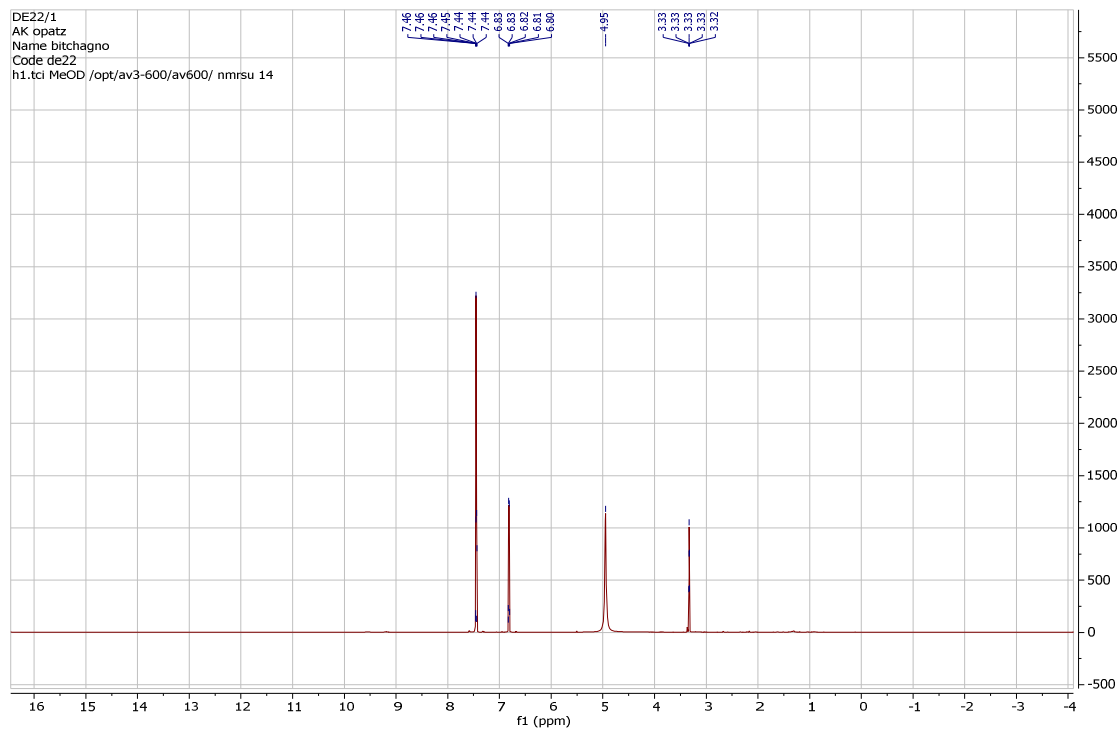

Figure S13:  $^1\text{H}$  NMR spectrum ( $\text{CD}_3\text{OD}$ , 600 MHz) of 6

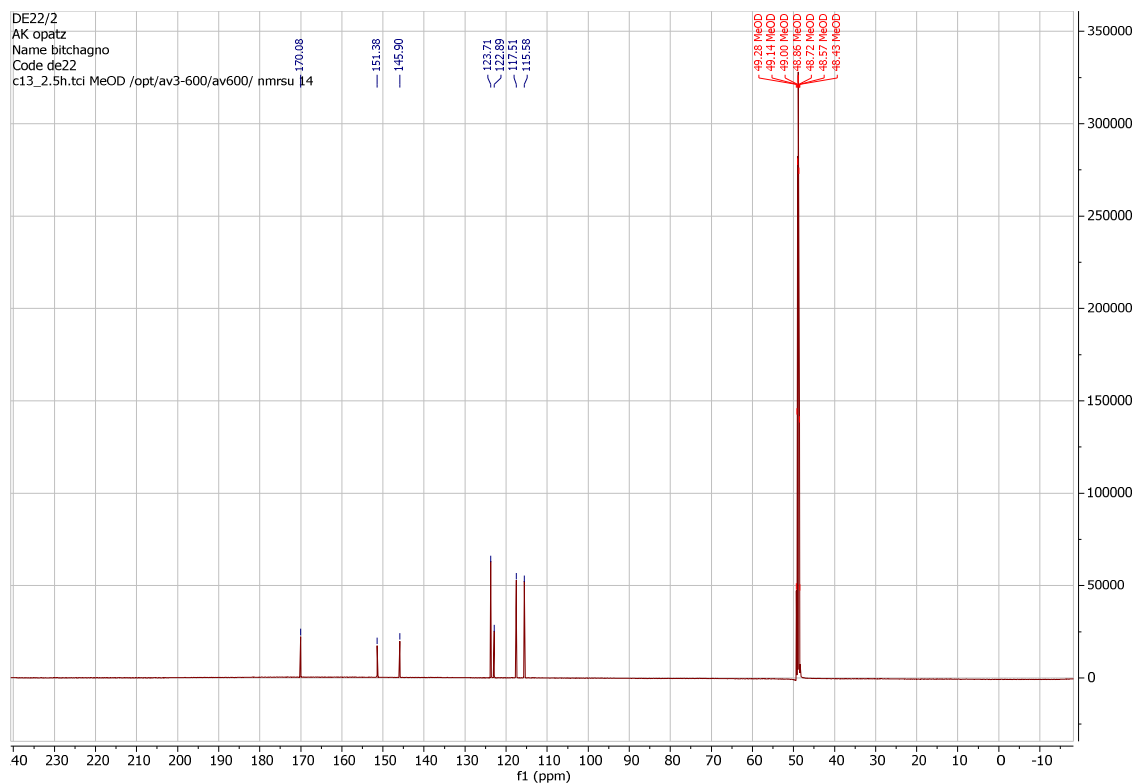

Figure S14:  $^{13}\text{C}$  NMR spectrum ( $\text{CD}_3\text{OD}$ , 150 MHz) of 6

### Confluentic acid (7)

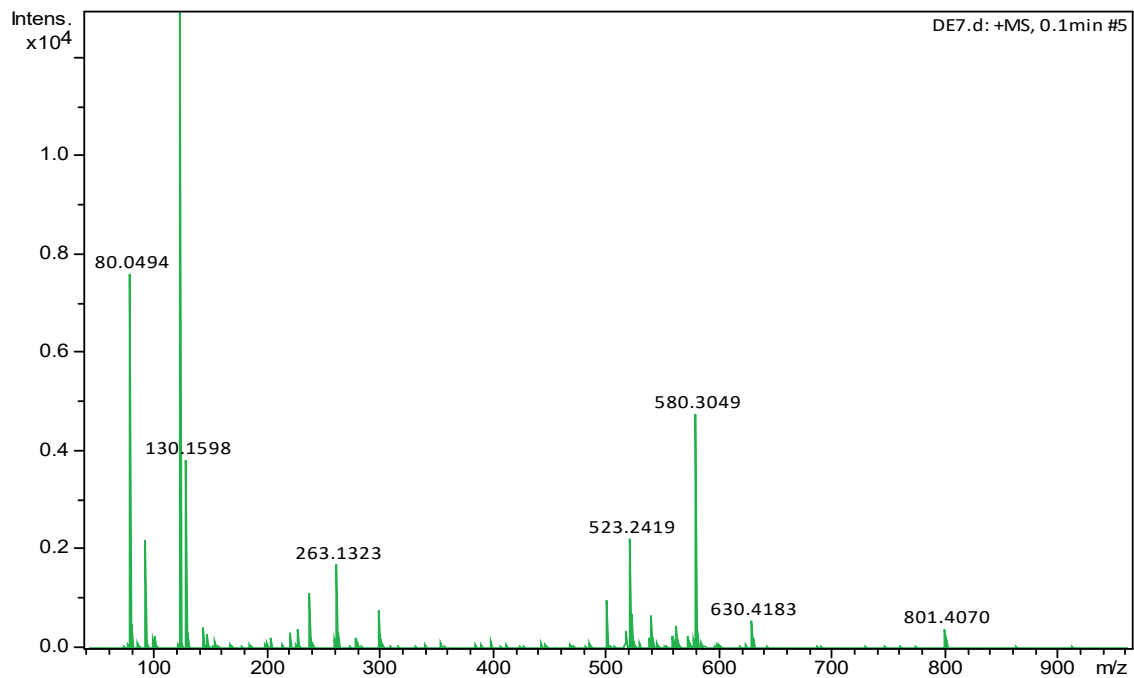

Figure S15: HR-ESI mass spectrum of 7

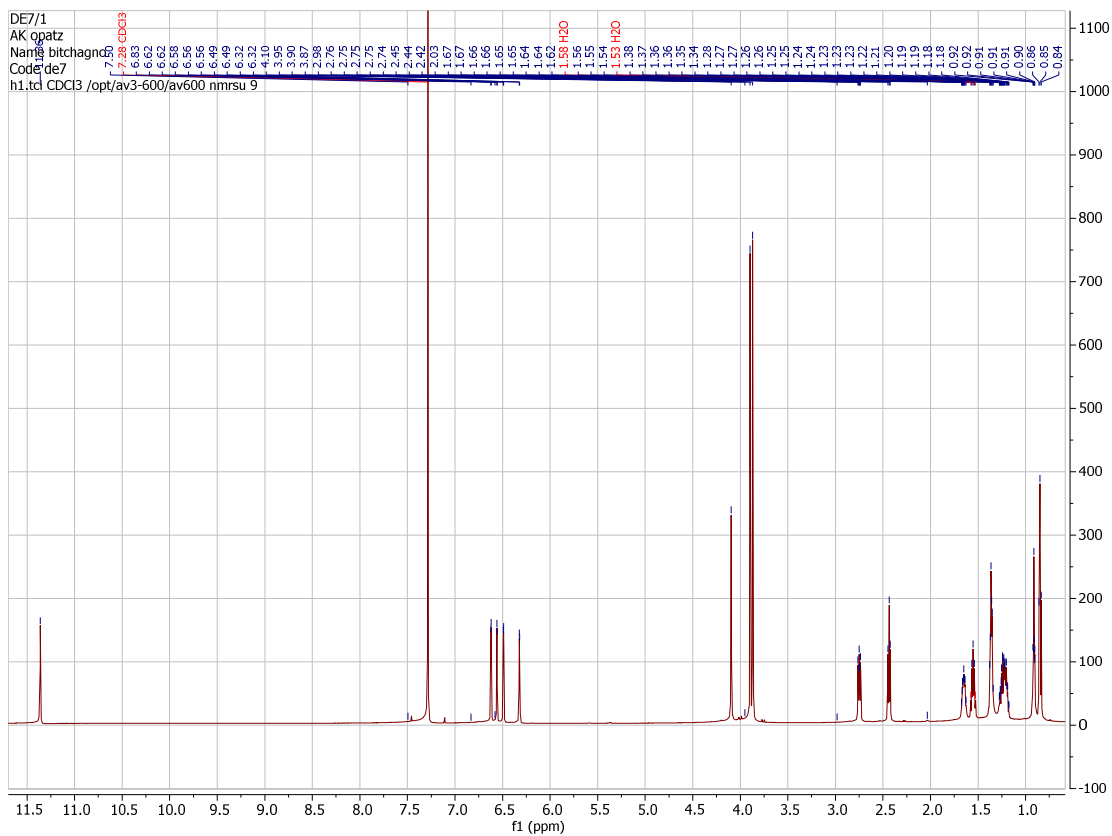

Figure S16: <sup>1</sup>H NMR spectrum (CDCl<sub>3</sub>, 600 MHz) of 7



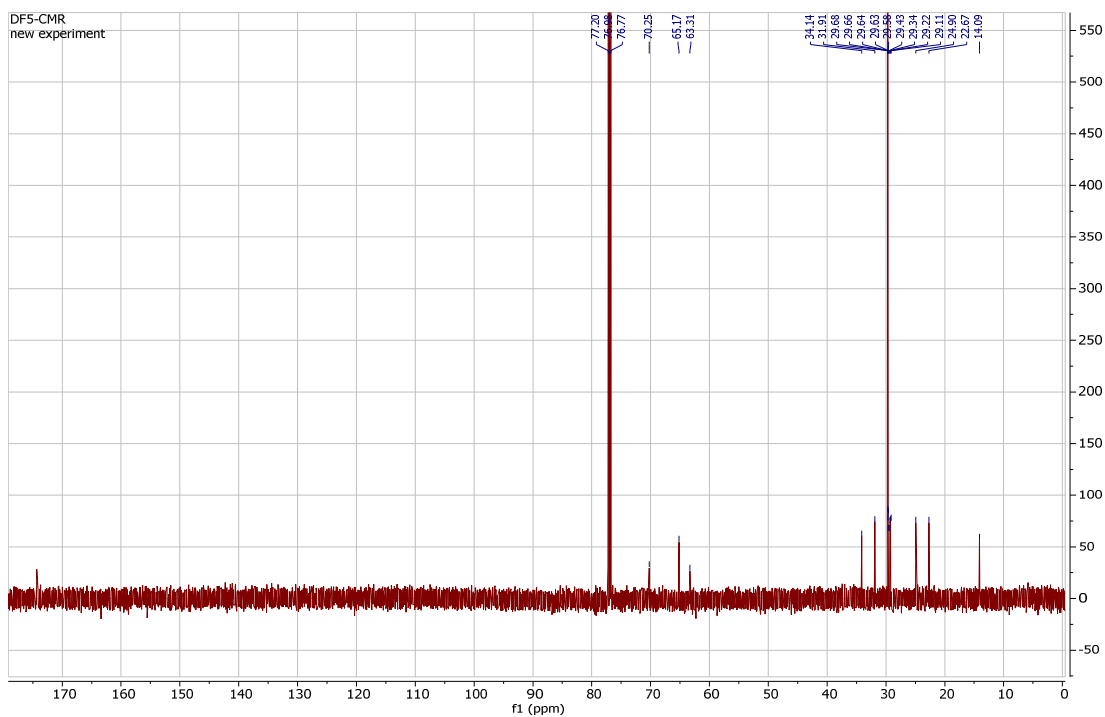

**Figure S19:**  $^{13}\text{C}$  NMR spectrum ( $\text{CDCl}_3$ , 150 MHz) of **8**

**Auranthiamide acetate (9)**

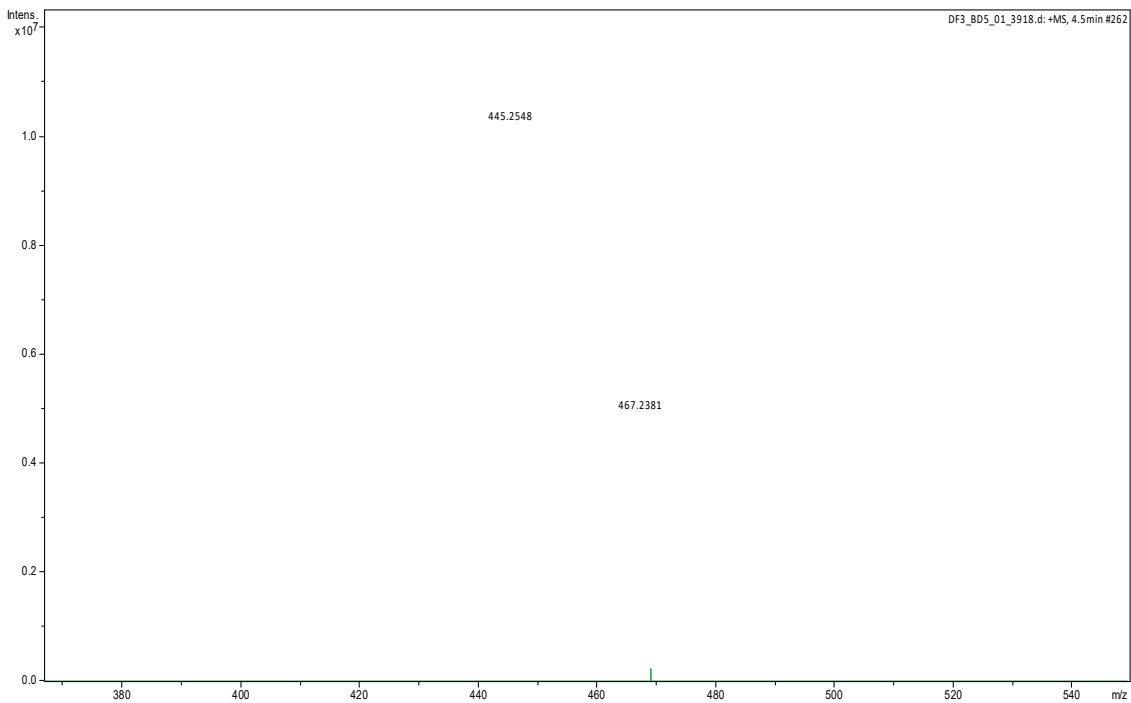

**Figure S20:** HR-ESI mass spectrum of **9**

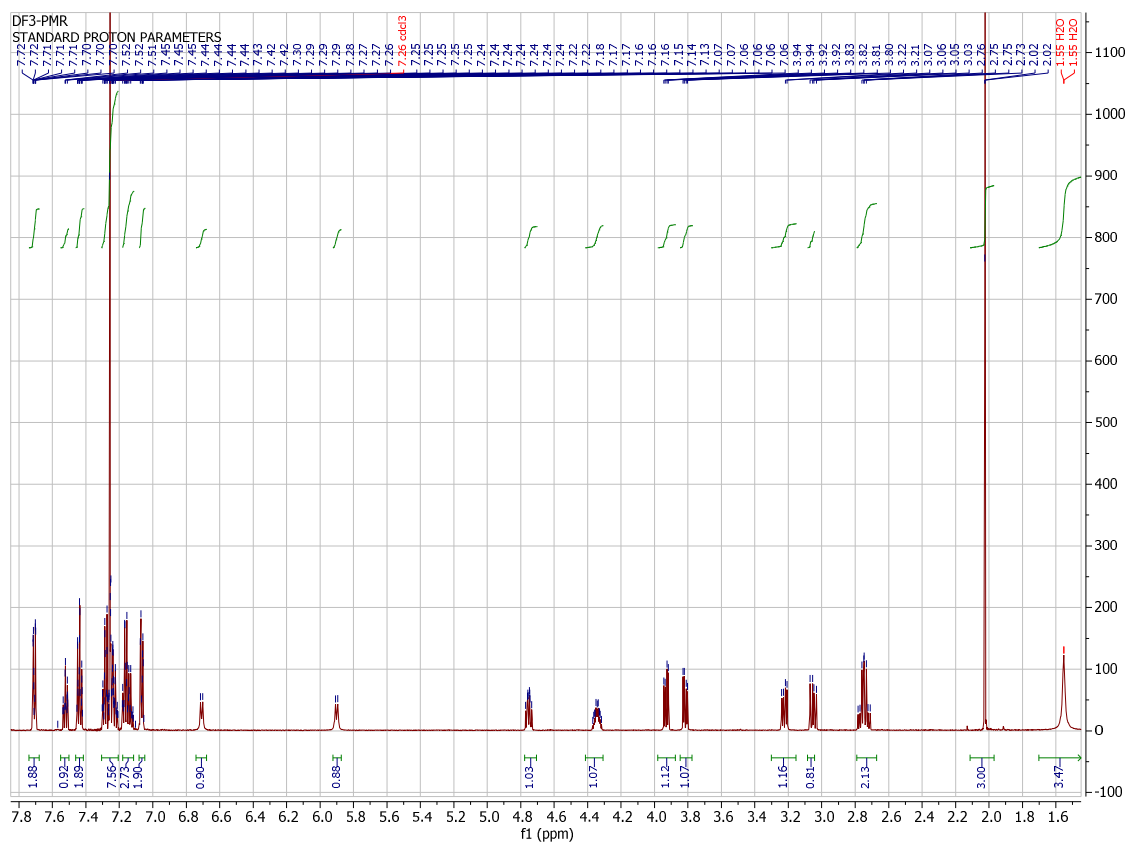

Figure S21:  $^1\text{H}$  NMR spectrum ( $\text{CDCl}_3$ , 600 MHz) of **9**

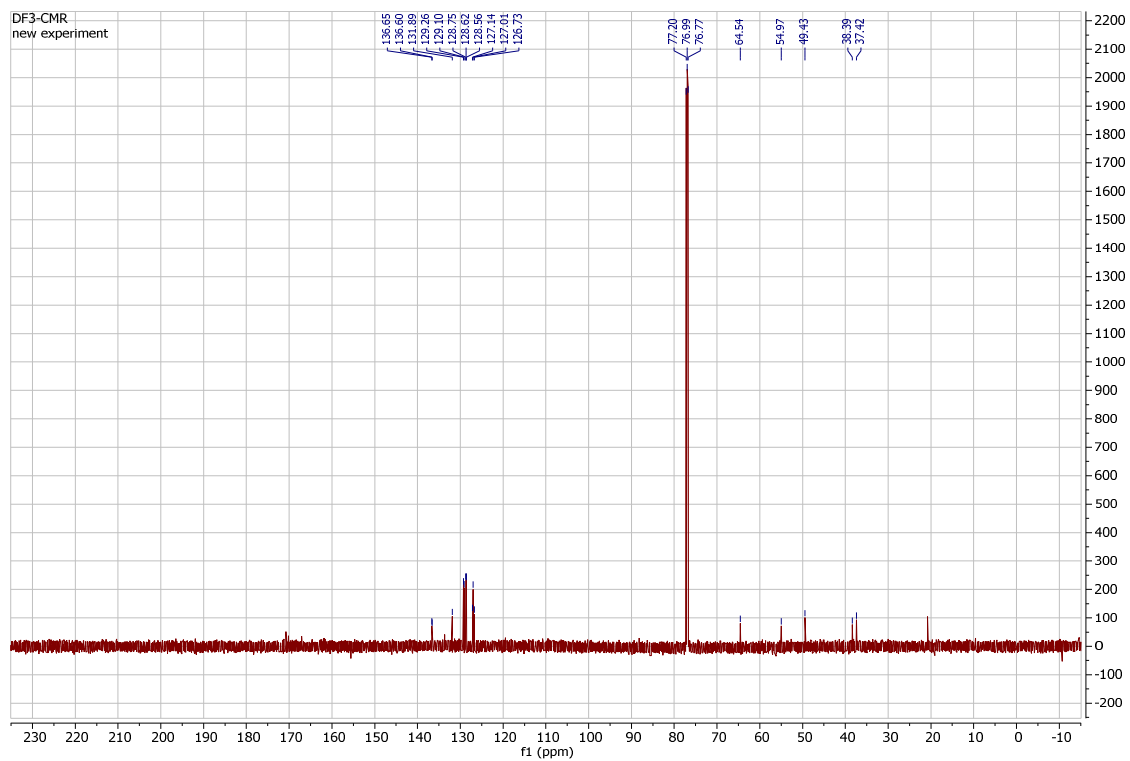

Figure S22:  $^{13}\text{C}$  NMR spectrum ( $\text{CDCl}_3$ , 150 MHz) of **9**

## Ethyl gallate (10)

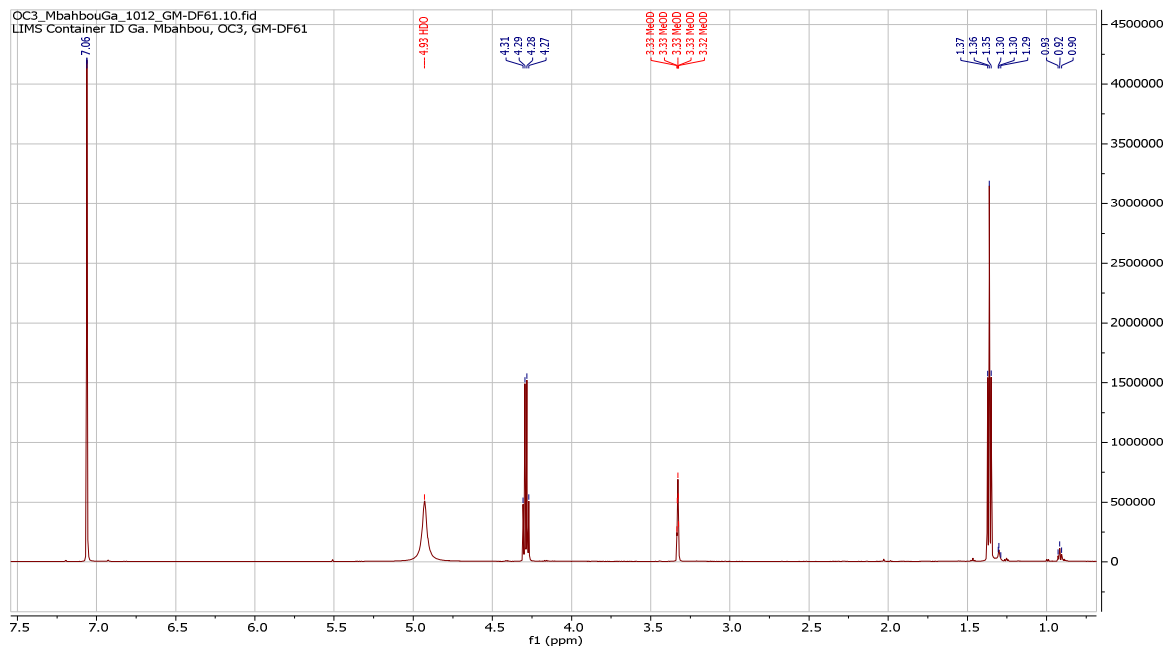

Figure S23: <sup>1</sup>H NMR spectrum (CD<sub>3</sub>OD, 600 MHz) of 10

## β- amyriacetate (11)

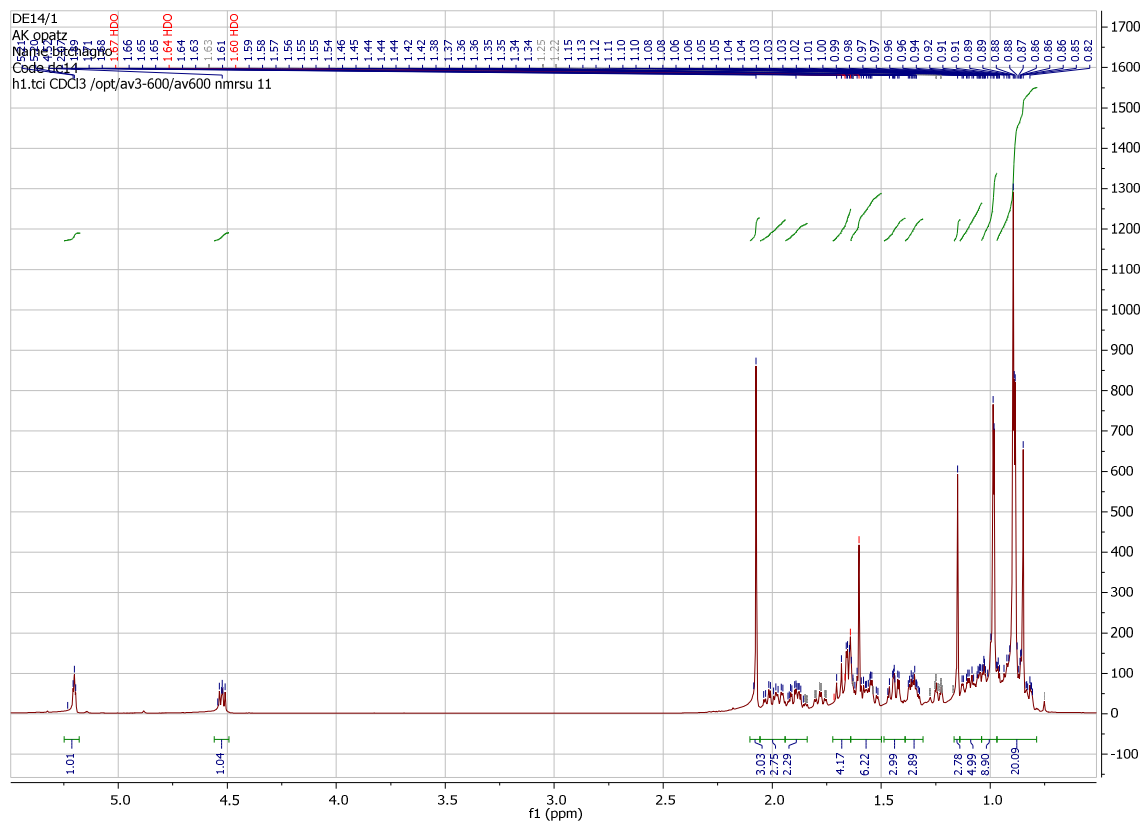

Figure S24: <sup>1</sup>H NMR spectrum (CDCl<sub>3</sub>, 600 MHz) of 11



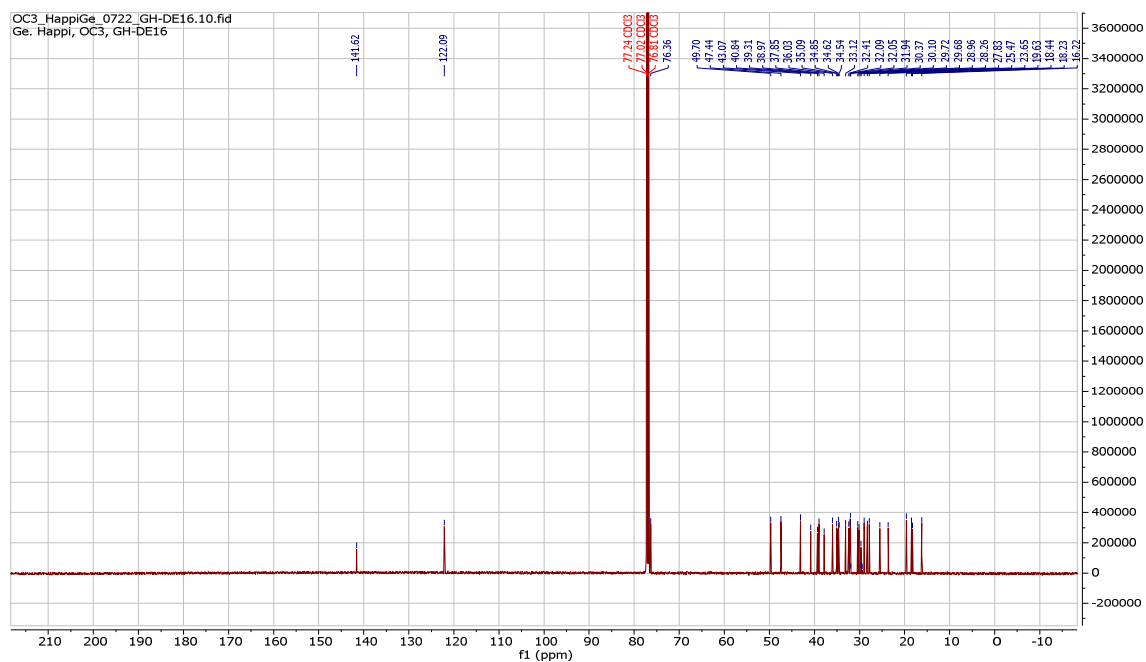

Figure S27:  $^{13}\text{C}$  NMR spectrum ( $\text{CDCl}_3$ , 150 MHz) of **12**

**3-Oxo-7,24Z-tirucalladien-26-oic acid (13)**

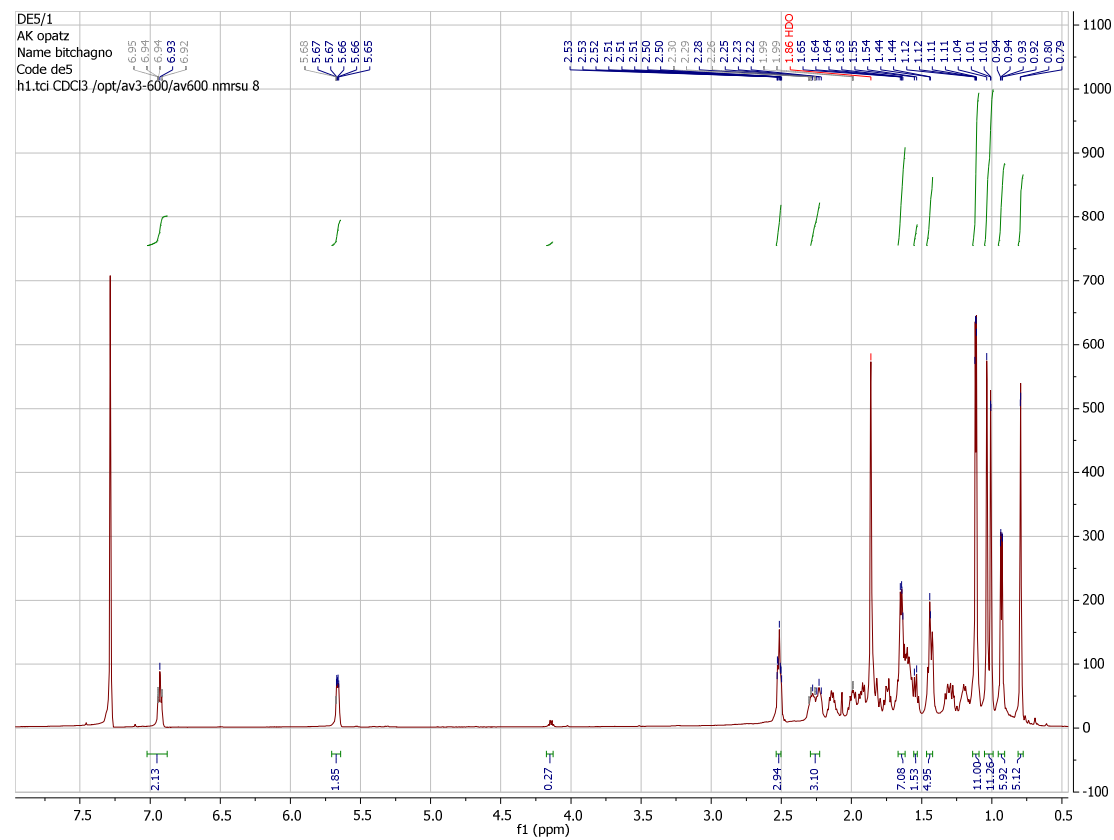

Figure S28:  $^1\text{H}$  NMR spectrum ( $\text{CDCl}_3$ , 600 MHz) of **13**



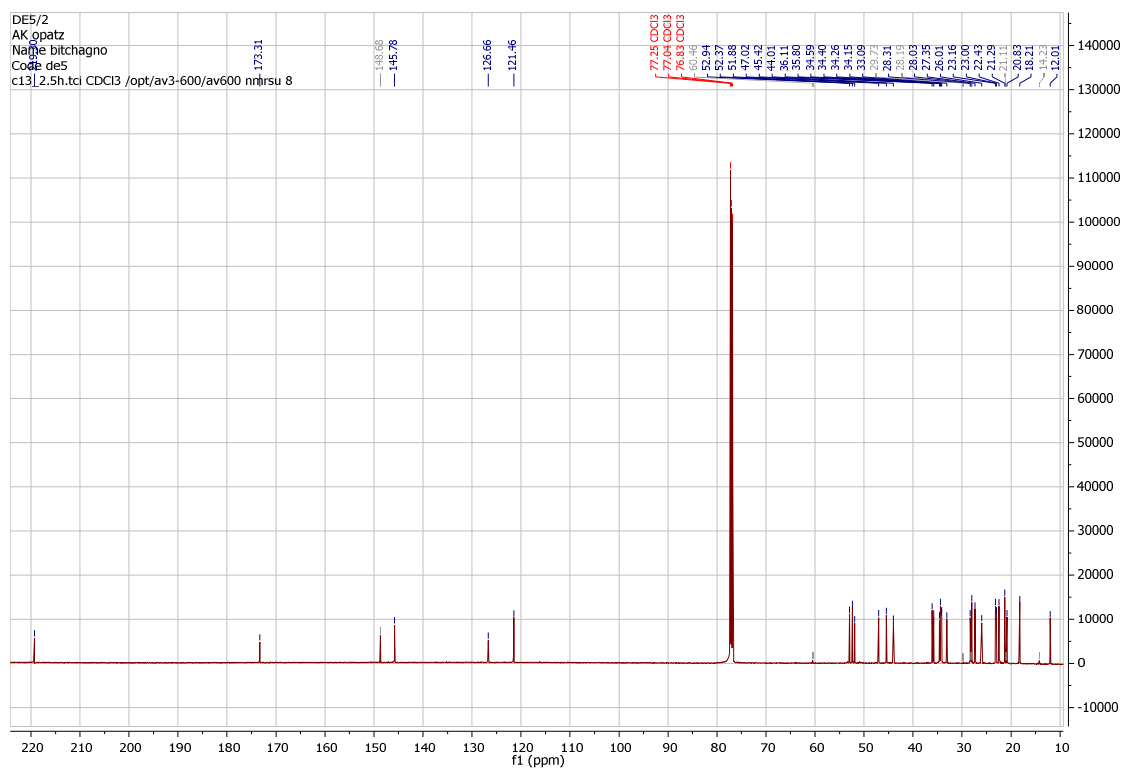

Figure S29:  $^{13}\text{C}$  NMR spectrum ( $\text{CDCl}_3$ , 150 MHz) of **13**

Mixture of  $\beta$ - and  $\alpha$ - amyrin (**14**)

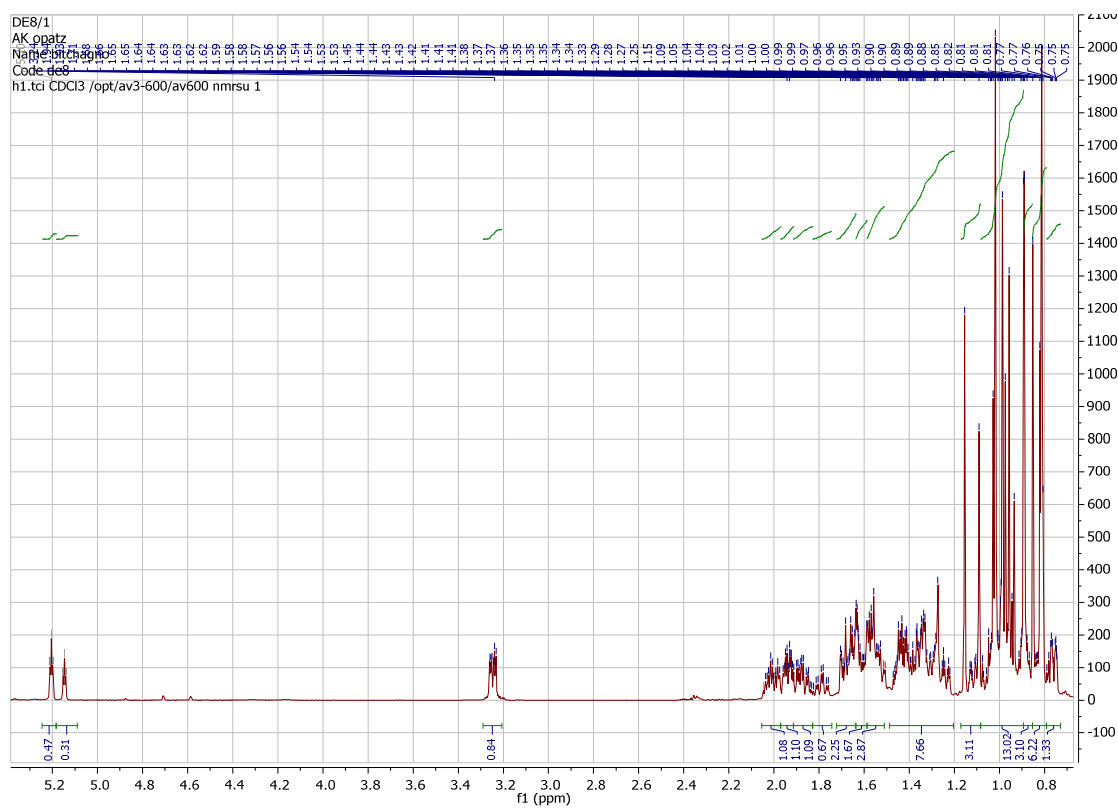

Figure S30:  $^1\text{H}$  NMR spectrum ( $\text{CDCl}_3$ , 600 MHz) of **14**
